# Supplementary material for: Safety Profile of Niraparib as Maintenance Therapy for Ovarian Cancer: A Systematic Review and Meta-Analysis
Source: MDPI journal article supplement (doi:10.3390/curroncol29010029), 2022-01-12
Supplement: s1 [file s1]

## Supplementary Materials

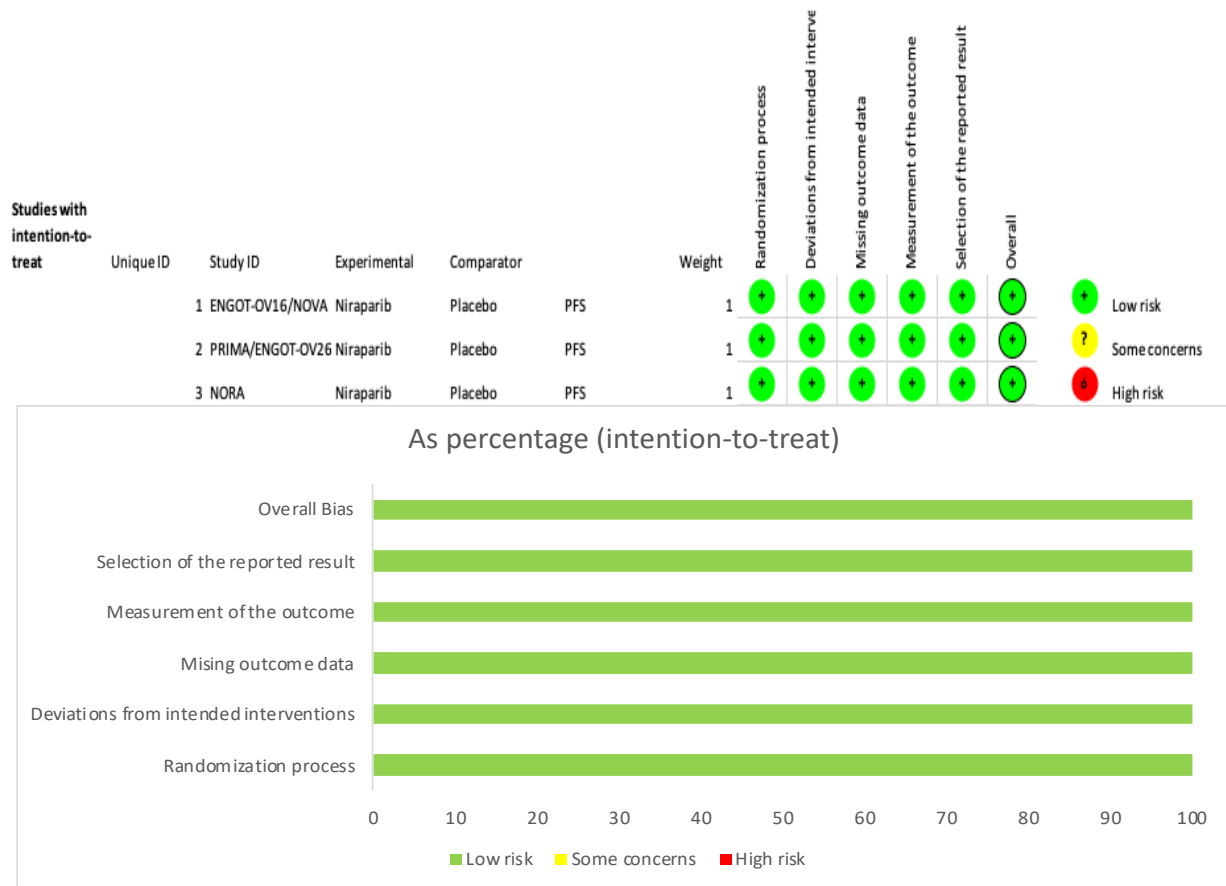

**Figure S1.** Risk of Bias (ROB2) summary; review authors' judgments about risk of bias item for each included study in the review & Risk of Bias (ROB2) of included studies in percentage (intention-to-treat).

**Table S1.** PRISMA Checklist 2009.

| Section/Topic                      | #  | Checklist Item                                                                                                                                                                                                                                                                                              | Reported on Page #                             |
|------------------------------------|----|-------------------------------------------------------------------------------------------------------------------------------------------------------------------------------------------------------------------------------------------------------------------------------------------------------------|------------------------------------------------|
| <b>TITLE</b>                       |    |                                                                                                                                                                                                                                                                                                             |                                                |
| Title                              | 1  | Identify the report as a systematic review, meta-analysis, or both.                                                                                                                                                                                                                                         | TITLE                                          |
| <b>ABSTRACT</b>                    |    |                                                                                                                                                                                                                                                                                                             |                                                |
| Structured summary                 | 2  | Provide a structured summary including, as applicable: background; objectives; data sources; study eligibility criteria, participants, and interventions; study appraisal and synthesis methods; results; limitations; conclusions and implications of key findings; systematic review registration number. | ABSTRACT                                       |
| <b>INTRODUCTION</b>                |    |                                                                                                                                                                                                                                                                                                             |                                                |
| Rationale                          | 3  | Describe the rationale for the review in the context of what is already known.                                                                                                                                                                                                                              | INTRODUCTION                                   |
| Objectives                         | 4  | Provide an explicit statement of questions being addressed with reference to participants, interventions, comparisons, outcomes, and study design (PICOS).                                                                                                                                                  | INTRODUCTION                                   |
| <b>METHODS</b>                     |    |                                                                                                                                                                                                                                                                                                             |                                                |
| Protocol and registration          | 5  | Indicate if a review protocol exists, if and where it can be accessed (e.g., Web address), and, if available, provide registration information including registration number.                                                                                                                               | 2.1 Study Design                               |
| Eligibility criteria               | 6  | Specify study characteristics (e.g., PICOS, length of follow-up) and report characteristics (e.g., years considered, language, publication status) used as criteria for eligibility, giving rationale.                                                                                                      | 2.3 Inclusion and Exclusion Criteria           |
| Information sources                | 7  | Describe all information sources (e.g., databases with dates of coverage, contact with study authors to identify additional studies) in the search and date last searched.                                                                                                                                  | 2.2 Searching                                  |
| Search                             | 8  | Present full electronic search strategy for at least one database, including any limits used, such that it could be repeated.                                                                                                                                                                               | 2.2 Searching                                  |
| Study selection                    | 9  | State the process for selecting studies (i.e., screening, eligibility, included in systematic review, and, if applicable, included in the meta-analysis).                                                                                                                                                   | 2.5 Study selection,                           |
| Data collection process            | 10 | Describe method of data extraction from reports (e.g., piloted forms, independently, in duplicate) and any processes for obtaining and confirming data from investigators.                                                                                                                                  | 2.4 Data Extraction                            |
| Data items                         | 11 | List and define all variables for which data were sought (e.g., PICOS, funding sources) and any assumptions and simplifications made.                                                                                                                                                                       | 2.4 Data Extraction                            |
| Risk of bias in individual studies | 12 | Describe methods used for assessing risk of bias of individual studies (including specification of whether this was done at the study or outcome level), and how this information is to be used in any data synthesis.                                                                                      | 2.6 Assessment Risk of Bias                    |
| Summary measures                   | 13 | State the principal summary measures (e.g., risk ratio, difference in means).                                                                                                                                                                                                                               | 2.7 Data analysis,                             |
| Synthesis of results               | 14 | Describe the methods of handling data and combining results of studies, if done, including measures of consistency (e.g., $I^2$ ) for each meta-analysis.                                                                                                                                                   | 2.8 Heterogeneity analysis                     |
| Risk of bias across studies        | 15 | Specify any assessment of risk of bias that may affect the cumulative evidence (e.g., publication bias, selective reporting within studies).                                                                                                                                                                | 2.6 Assessment Risk of Bias                    |
| Additional analyses                | 16 | Describe methods of additional analyses (e.g., sensitivity or subgroup analyses, meta-regression), if done, indicating which were pre-specified.                                                                                                                                                            | 2.7 Data analysis & 2.8 Heterogeneity analysis |
| <b>RESULTS</b>                     |    |                                                                                                                                                                                                                                                                                                             |                                                |

|                               |    |                                                                                                                                                                                                          |                                                                                                      |
|-------------------------------|----|----------------------------------------------------------------------------------------------------------------------------------------------------------------------------------------------------------|------------------------------------------------------------------------------------------------------|
| Study selection               | 17 | Give numbers of studies screened, assessed for eligibility, and included in the review, with reasons for exclusions at each stage, ideally with a flow diagram.                                          | Figure 1                                                                                             |
| Study characteristics         | 18 | For each study, present characteristics for which data were extracted (e.g., study size, PICOS, follow-up period) and provide the citations.                                                             | Table 1                                                                                              |
| Risk of bias within studies   | 19 | Present data on risk of bias of each study and, if available, any outcome level assessment (see item 12).                                                                                                | Figure 2                                                                                             |
| Results of individual studies | 20 | For all outcomes considered (benefits or harms), present, for each study: (a) simple summary data for each intervention group (b) effect estimates and confidence intervals, ideally with a forest plot. | 3.2 Meta- Analysis of Any Grade and Grade $\frac{3}{4}$ Adverse Effects, Tables 3 & 4, Figures 3 & 4 |
| Synthesis of results          | 21 | Present results of each meta-analysis done, including confidence intervals and measures of consistency.                                                                                                  | 3.2 Meta- Analysis of Any Grade and Grade $\frac{3}{4}$ Adverse Effects, Figures 3 & 4               |
| Risk of bias across studies   | 22 | Present results of any assessment of risk of bias across studies (see Item 15).                                                                                                                          | Figure 2                                                                                             |
| Additional analysis           | 23 | Give results of additional analyses, if done (e.g., sensitivity or subgroup analyses, meta-regression [see Item 16]).                                                                                    | 3.1 PFS analysis                                                                                     |
| <b>DISCUSSION</b>             |    |                                                                                                                                                                                                          |                                                                                                      |
| Summary of evidence           | 24 | Summarize the main findings including the strength of evidence for each main outcome; consider their relevance to key groups (e.g., healthcare providers, users, and policy makers).                     | DISCUSSION                                                                                           |
| Limitations                   | 25 | Discuss limitations at study and outcome level (e.g., risk of bias), and at review-level (e.g., incomplete retrieval of identified research, reporting bias).                                            | DISCUSSION                                                                                           |
| Conclusions                   | 26 | Provide a general interpretation of the results in the context of other evidence, and implications for future research.                                                                                  | CONCLUSION                                                                                           |
| <b>FUNDING</b>                |    |                                                                                                                                                                                                          |                                                                                                      |
| Funding                       | 27 | Describe sources of funding for the systematic review and other support (e.g., supply of data); role of funders for the systematic review.                                                               | Conflict of interest statement                                                                       |

**Table S2.** Any Grade Side Effects of NOVA, PRIMA and NORA studies.

|                             | NOVA STUDY           |                    | PRIMA STUDY          |                    | NORA STUDY           |                   |
|-----------------------------|----------------------|--------------------|----------------------|--------------------|----------------------|-------------------|
|                             | 2016                 |                    | 2019                 |                    | 2021                 |                   |
|                             | Niraparib<br>(n=367) | Placebo<br>(n=179) | Niraparib<br>(n=484) | Placebo<br>(n=244) | Niraparib<br>(n=177) | Placebo<br>(n=88) |
| NAUSEA ANY GRADE            | 270                  | 63                 | 278                  | 67                 | 94                   | 17                |
| +FATIGUE ANY GRADE          | 218                  | 74                 | 168                  | 72                 | 45                   | 22                |
| ANEMIA ANY GRADE            | 184                  | 12                 | 307                  | 43                 | 94                   | 25                |
| *THROMBOCYTOPENIA ANY GRADE | 225                  | 10                 | 355                  | 12                 | 97                   | 22                |
| VOMITING ANY GRADE          | 126                  | 29                 | 108                  | 29                 | 57                   | 4                 |

|                                |     |    |     |    |     |    |
|--------------------------------|-----|----|-----|----|-----|----|
| NEUTROPENIA ANY GRADE          | 111 | 11 | 128 | 16 | 104 | 37 |
| HEADACHE ANY GRADE             | 95  | 17 | 126 | 36 | 32  | 7  |
| DECREASED APPETITE ANY GRADE   | 93  | 26 | NR  | NR | 31  | 2  |
| DIARRHEA ANY GRADE             | 70  | 37 | NR  | NR | 24  | 12 |
| CONSTIPATION ANY GRADE         | 146 | 36 | 189 | 46 | 53  | 9  |
| ABDOMINAL PAIN ANY GRADE       | 83  | 53 | 106 | 75 | 18  | 17 |
| BACK PAIN ANY GRADE            | 49  | 21 | NR  | NR | 14  | 14 |
| INSOMNIA ANY GRADE             | 89  | 13 | 119 | 35 | 51  | 8  |
| ABDOMINAL DISTENTION ANY GRADE | 28  | 22 | NR  | NR | 24  | 8  |
| PALPITATIONS ANY GRADE         | 38  | 3  | NR  | NR | 32  | 5  |
| NASOPHARYNGITIS ANY GRADE      | 41  | 13 | NR  | NR | 14  | 10 |
| COUGH ANY GRADE                | 55  | 8  | NR  | NR | 21  | 6  |
| DIZZINESS ANY GRADE            | 61  | 13 | NR  | NR | 24  | 11 |
| HYPERTENSION ANY GRADE         | 71  | 8  | NR  | NR | 20  | 1  |

NR, none reported;

† The category of fatigue includes reports of fatigue, asthenia, malaise and lethargy in all three studies;

\* The category of thrombocytopenia includes reports of thrombocytopenia and decreased platelet count in all three studies.

**Table S3.** Grade 3 or 4 Side Effects of NOVA, PRIMA and NORA studies.

|                                               | NOVA STUDY<br>2016   |                    | PRIMA STUDY<br>2019  |                    | NORA STUDY<br>2021   |                   |
|-----------------------------------------------|----------------------|--------------------|----------------------|--------------------|----------------------|-------------------|
|                                               | Niraparib<br>(n=367) | Placebo<br>(n=179) | Niraparib<br>(n=484) | Placebo<br>(n=244) | Niraparib<br>(n=177) | Placebo<br>(n=88) |
| NAUSEA GRADE $\frac{3}{4}$                    | 11                   | 2                  | 6                    | 2                  | 0                    | 0                 |
| †FATIGUE GRADE $\frac{3}{4}$                  | 30                   | 1                  | 9                    | 1                  | 1                    | 0                 |
| ANEMIA GRADE $\frac{3}{4}$                    | 93                   | 0                  | 150                  | 4                  | 26                   | 2                 |
| *THROMBOCYTOPENIA<br>GRADE $\frac{3}{4}$      | 124                  | 1                  | 202                  | 2                  | 20                   | 1                 |
| VOMITING GRADE $\frac{3}{4}$                  | 7                    | 1                  | 4                    | 2                  | 4                    | 0                 |
| NEUTROPENIA GRADE<br>$\frac{3}{4}$            | 72                   | 3                  | 62                   | 3                  | 36                   | 7                 |
| HEADACHE GRADE $\frac{3}{4}$                  | 1                    | 0                  | 2                    | 0                  | 1                    | 0                 |
| DIARRHEA GRADE $\frac{3}{4}$                  | 1                    | 2                  | NR                   | NR                 | 0                    | 1                 |
| CONSTIPATION GRADE<br>$\frac{3}{4}$           | 2                    | 1                  | 1                    | 0                  | 1                    | 0                 |
| ABDOMINAL PAIN<br>GRADE $\frac{3}{4}$         | 4                    | 3                  | 7                    | 1                  | 0                    | 1                 |
| INSOMNIA GRADE $\frac{3}{4}$                  | 1                    | 0                  | 4                    | 1                  | 1                    | 0                 |
| ABDOMINAL DISTEN-<br>TION GRADE $\frac{3}{4}$ | 0                    | 1                  | NR                   | NR                 | 1                    | 0                 |
| HYPERTENSION GRADE<br>$\frac{3}{4}$           | 30                   | 4                  | NR                   | NR                 | 2                    | 0                 |

NR, none reported;

† The category of fatigue includes reports of fatigue, asthenia, malaise and lethargy in all three studies;

\* The category of thrombocytopenia includes reports of thrombocytopenia and decreased platelet count in all three studies.
